# Supplementary material
Source: Research Square preprint supplement (doi:10.21203/rs.3.rs-9217734/v1)
Supplement: Supplementary file 1 [file c2062d58fab2256e3cc97fa0.pdf]

# 1 Metrics

## 1.1 Regression Metrics

$$MAE = \frac{1}{n} \sum_{i=1}^n |y_i - \hat{y}_i| \quad (1)$$

$$RMSE = \sqrt{\frac{1}{n} \sum_{i=1}^n (y_i - \hat{y}_i)^2} \quad (2)$$

$$MAPE = \frac{1}{n} \sum_{i=1}^n \left| \frac{y_i - \hat{y}_i}{y_i} \right| \times 100\% \quad (3)$$

$$PCC = \frac{\sum_{i=1}^n (y_i - \bar{y})(\hat{y}_i - \bar{\hat{y}})}{\sqrt{\sum_{i=1}^n (y_i - \bar{y})^2} \sqrt{\sum_{i=1}^n (\hat{y}_i - \bar{\hat{y}})^2}} \quad (4)$$

$$FC_{PCC}(X, Y) = \frac{\sum_{i=1}^n (X_i - \bar{X})(Y_i - \bar{Y})}{\sqrt{\sum_{i=1}^n (X_i - \bar{X})^2} \sqrt{\sum_{i=1}^n (Y_i - \bar{Y})^2}} \quad (5)$$

$$FN = \sqrt{\sum_{i,j} |A_{ij} - B_{ij}|^2} \quad (6)$$

## 1.2 Classification Metrics

$$\text{Precision} = \frac{TP}{TP + FP} \quad (7)$$

$$\text{Accuracy} = \frac{TP + TN}{TP + TN + FP + FN} \quad (8)$$

$$\text{F1 Score} = \frac{2 \times \text{Precision} \times \text{Recall}}{\text{Precision} + \text{Recall}} = \frac{2TP}{2TP + FP + FN} \quad (9)$$

$$\text{Specificity} = \frac{TN}{TN + FP} \quad (10)$$

## 2 Performance

**Table 1:** Comparative experimental results on UKB. The best result is **bolded**, and the second best is underlined. Metrics include Mean Absolute Error ( $MAE$ ), Root Mean Square Error ( $RMSE$ ), Mean Absolute Percentage Error ( $MAPE$ ), Correlation Coefficient ( $PCC$ ), Functional Connectivity PCC ( $FC_{PCC}$ ), and Feature Norm ( $FN$ ).

| Category    | Model                 | $MAE$          | $RMSE$         | $MAPE$        | $PCC$         | $FC_{PCC}$    | $FN$         |
|-------------|-----------------------|----------------|----------------|---------------|---------------|---------------|--------------|
| Transformer | BrainTransformer [35] | 20.2087        | 30.0437        | 0.2419        | 0.0029        | 0.0705        | 120.99       |
|             | iTransformer [34]     | 19.5380        | 29.0149        | 0.2346        | 0.1045        | 0.2305        | 128.69       |
|             | PatchTST [36]         | 18.9038        | 27.9970        | 0.2298        | 0.2039        | 0.7732        | 34.96        |
| Linear      | DLinear [38]          | 15.0546        | 21.4078        | 0.1969        | <u>0.5116</u> | 0.9703        | 15.87        |
|             | TSMixer [37]          | 15.9711        | 22.9913        | 0.2037        | 0.4818        | 0.8163        | 36.21        |
|             | LightTS [39]          | <u>15.1007</u> | 21.5178        | <u>0.1968</u> | 0.5094        | 0.9688        | 17.17        |
| Graph       | MSGNet [31]           | 19.7222        | 29.2989        | 0.2363        | 0.0520        | 0.2977        | 94.97        |
|             | FourierGNN [33]       | 17.5481        | 25.5135        | 0.2193        | 0.3612        | 0.8776        | 25.30        |
|             | ForecastGrapher [32]  | 31.2625        | 46.1902        | 0.3742        | 0.0471        | 0.6004        | 46.83        |
| LLM Model   | One Fit All [41]      | 15.1127        | <u>21.4374</u> | 0.1985        | 0.5020        | <u>0.9766</u> | <u>13.25</u> |
|             | SimMTM [40]           | 15.9283        | 22.8618        | 0.2045        | 0.4537        | 0.9080        | 22.15        |
|             | BOLD-Cast             | <b>5.9595</b>  | <b>15.8012</b> | <b>0.0744</b> | <b>0.9594</b> | <b>0.9960</b> | <b>4.80</b>  |

**Table 2:** Experimental results on **HCP-YA**, **HCP-A**, **HCP-D**, and **ABIDE**

| Method | $MAE$   | $RMSE$  | $MAPE$ | $PCC$  | $FC_{PCC}$ | $FN$   |
|--------|---------|---------|--------|--------|------------|--------|
| HCP-YA | 7.3909  | 10.2241 | 0.1045 | 0.9562 | 0.9929     | 5.0612 |
| HCP-A  | 10.5163 | 14.2336 | 0.1263 | 0.9847 | 0.9864     | 5.6261 |
| HCP-D  | 12.6548 | 16.3170 | 0.1549 | 0.9722 | 0.9830     | 6.5438 |
| ABIDE  | 10.1812 | 18.4301 | 0.1868 | 0.9614 | 0.9459     | 7.4615 |

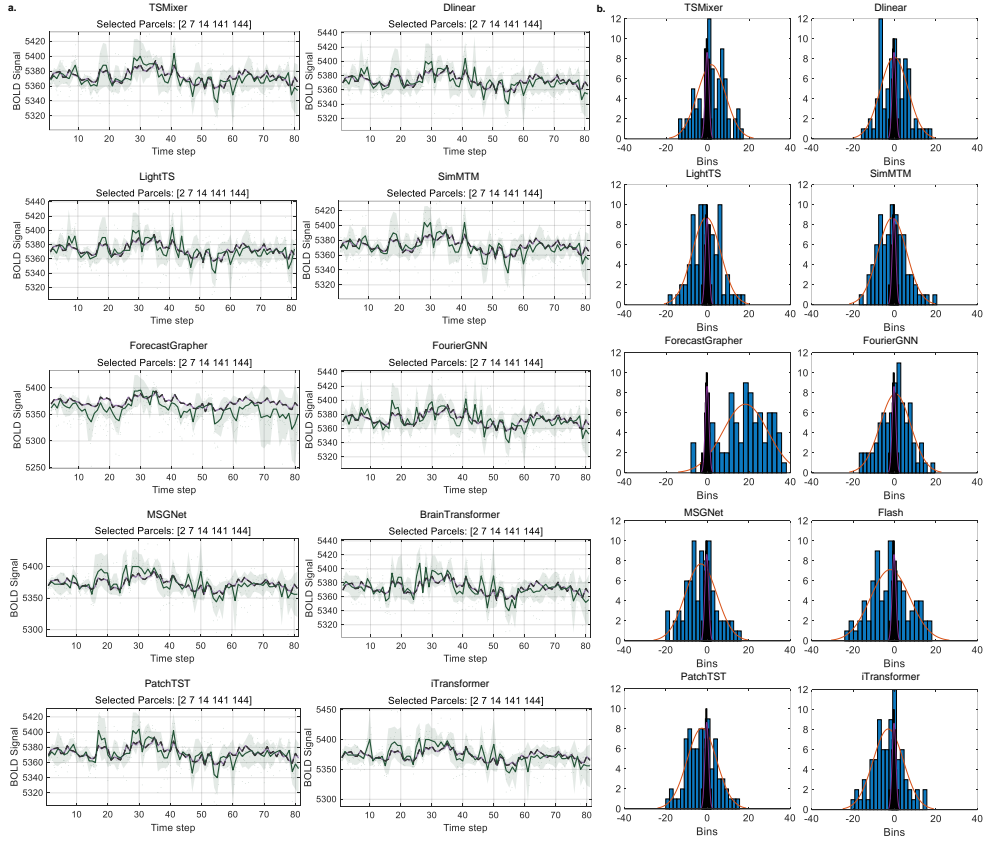

**Fig. 1:** Benchmarking BOLD-Cast on UK Biobank fMRI dataset. **a**, Representative BOLD signal trajectories from two resting-state networks (parietal and supra-marginal), each visualized by averaging the signals across their constituent parcels. Individual parcels are shown as scattered points. Ground-truth (black), 10 SOTAs (green) are overlaid. Shaded bands indicate inter-parcel variability. **b**, Histogram of voxel-wise prediction errors, aggregated across all samples. BOLD-Cast (purple), 10 SOTAs (blue) are overlaid.

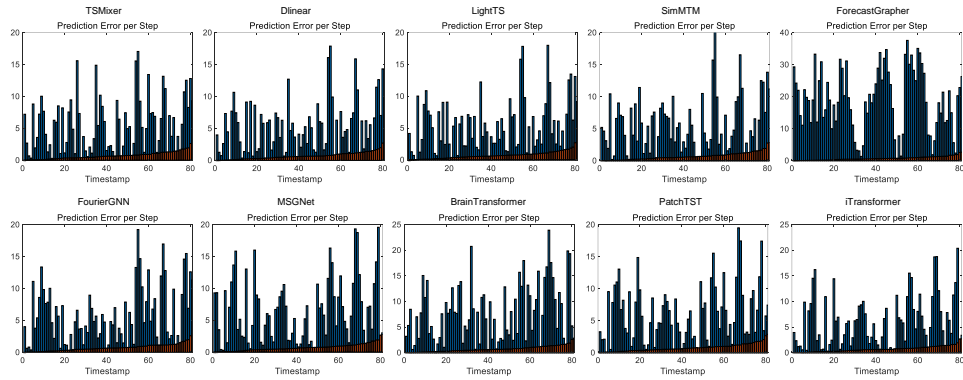

**Fig. 2:** Step-wise absolute prediction errors across time. Compared to 10 SOTAs, BOLD-Cast yields consistently smaller and more stable errors across the horizon. BOLD-Cast (red), 10 SOTAs (blue) are overlaid.

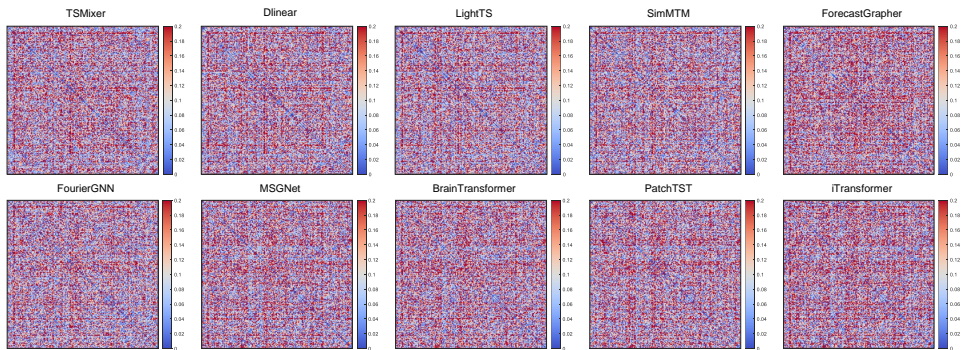

**Fig. 3:** Heatmaps of FC deviation from ground-truth FC.

### 3 Scalability

**Table 3:** Scalability evaluation of the proposed model on the UKB dataset. Here, “1” denotes prediction with  $1\times$  sequence length, “2” denotes  $2\times$  prediction length, and “3” denotes  $3\times$  prediction length.

| <b>UKB</b> | <i>MAE</i> | <i>RMSE</i> | <i>MAPE</i> | <i>PCC</i> | <i>FC<sub>PCC</sub></i> | <i>FN</i> |
|------------|------------|-------------|-------------|------------|-------------------------|-----------|
| 1          | 5.960272   | 15.80382    | 0.074366    | 0.959444   | 0.99737                 | 4.80696   |
| 2          | 14.16711   | 27.88933    | 0.169294    | 0.749358   | 0.87334                 | 27.4937   |
| 3          | 18.17853   | 32.16586    | 0.215275    | 0.588536   | 0.82327                 | 32.8177   |

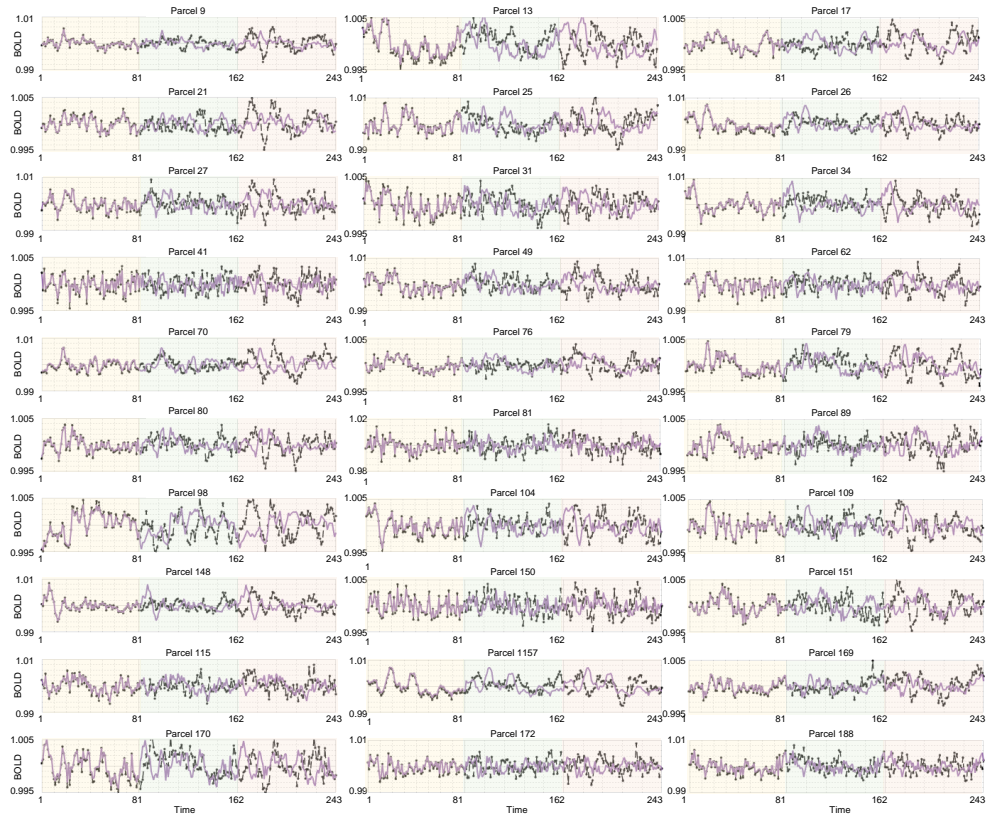

**Fig. 4:** Time-series prediction results of the proposed BOLD-Cast model. The plots show a comparison between the ground-truth BOLD signals (black lines) and the self-tested predictions (colored lines) for 30 randomly selected parcels from the CC200 atlas. Predictions corresponding to  $1\times$ ,  $2\times$ , and  $3\times$  the input length are displayed in yellow, green, and orange, respectively. Each sub-plot represents a distinct parcel, arranged in a grid layout, with the x-axis indicating time and the y-axis representing the blood-oxygen-level dependent (BOLD) signal. The results demonstrate close alignment between the predicted and actual time series across various parcels and prediction horizons.

## 4 Generalization

**Table 4:** Results predicted directly on **HCP-YA** using the model trained on UKB.

| <b>Method</b>         | <i>MAE</i> | <i>RMSE</i> | <i>MAPE</i> | <i>PCC</i> | <i>FC<sub>PCC</sub></i> | <i>FN</i> |
|-----------------------|------------|-------------|-------------|------------|-------------------------|-----------|
| BOLD-Cast             | 2.5344     | 3.5230      | 0.0334      | 0.9862     | 0.9963                  | 5.0043    |
| ForecastGrapher [32]  | 20.4581    | 27.2546     | 0.2594      | 0.4152     | 0.8258                  | 35.0849   |
| FourierGNN [33]       | 22.1698    | 29.6735     | 0.2790      | 0.3157     | 0.8306                  | 25.3962   |
| MSGNet [31]           | 22.4069    | 29.8570     | 0.2792      | 0.0478     | 0.2188                  | 99.4921   |
| BrainTransformer [35] | 24.6038    | 32.7973     | 0.3065      | 0.0010     | 0.0496                  | 82.6730   |
| iTransformer [34]     | 22.3124    | 29.7395     | 0.2782      | 0.0841     | 0.2036                  | 130.2870  |
| PatchTST [36]         | 20.7234    | 27.6625     | 0.2611      | 0.4106     | 0.9183                  | 18.0014   |
| SimMTM [40]           | 20.0715    | 26.7488     | 0.2553      | 0.4273     | 0.8767                  | 22.7491   |
| DLinear [38]          | 19.4890    | 26.0447     | 0.2495      | 0.4790     | 0.9583                  | 16.6756   |
| LightTS [39]          | 19.4474    | 25.9918     | 0.2487      | 0.4801     | 0.9554                  | 18.3423   |
| TSMixer [37]          | 20.7952    | 27.8729     | 0.2635      | 0.4215     | 0.7786                  | 34.5488   |
| One Fit All [41]      | 19.8574    | 26.6801     | 0.2541      | 0.4500     | 0.9478                  | 14.7505   |

**Table 5:** Results predicted directly on **HCP-A** using the model trained on UKB.

| <b>Method</b>         | <i>MAE</i> | <i>RMSE</i> | <i>MAPE</i> | <i>PCC</i> | <i>FC<sub>PCC</sub></i> | <i>FN</i> |
|-----------------------|------------|-------------|-------------|------------|-------------------------|-----------|
| BOLD-Cast             | 5.9359     | 13.8357     | 0.0765      | 0.9555     | 0.9902                  | 6.3423    |
| ForecastGrapher [32]  | 18.2882    | 32.1008     | 0.2174      | 0.3678     | 0.7046                  | 39.7370   |
| FourierGNN [33]       | 39.0462    | 46.2622     | 0.2310      | 0.3044     | 0.8385                  | 26.0966   |
| MSGNet [31]           | 19.7092    | 26.5311     | 0.2468      | 0.0334     | 0.2214                  | 102.3460  |
| BrainTransformer [35] | 58.1294    | 67.0210     | 0.6858      | 0.0015     | 0.0520                  | 84.9479   |
| iTransformer [34]     | 19.7286    | 26.5496     | 0.2472      | 0.0627     | 0.2155                  | 128.1340  |
| PatchTST [36]         | 18.4321    | 32.7639     | 0.2116      | 0.3683     | 0.8987                  | 21.2430   |
| SimMTM [40]           | 17.9924    | 32.7336     | 0.2120      | 0.3900     | 0.8560                  | 27.9462   |
| DLinear [38]          | 29.7842    | 35.8975     | 0.2063      | 0.4556     | 0.9600                  | 16.9521   |
| LightTS [39]          | 30.0381    | 36.2487     | 0.2057      | 0.4549     | 0.9565                  | 18.7103   |
| TSMixer [37]          | 33.4622    | 41.3429     | 0.2206      | 0.3975     | 0.7694                  | 37.9118   |
| One Fit All [41]      | 16.0127    | 21.1898     | 0.2110      | 0.4130     | 0.9492                  | 15.4822   |

**Table 6:** Results predicted directly on **HCP-D** using the model trained on UKB.

| <b>Method</b>         | <i>MAE</i> | <i>RMSE</i> | <i>MAPE</i> | <i>PCC</i> | <i>FC<sub>PCC</sub></i> | <i>FN</i> |
|-----------------------|------------|-------------|-------------|------------|-------------------------|-----------|
| BOLD-Cast             | 7.2284     | 10.6253     | 0.0928      | 0.9867     | 0.9964                  | 5.0443    |
| ForecastGrapher [32]  | 38.7098    | 52.2318     | 0.5005      | 0.5022     | 0.7571                  | 43.1136   |
| FourierGNN [33]       | 45.1674    | 60.4220     | 0.5826      | 0.2646     | 0.7581                  | 36.9197   |
| MSGNet [31]           | 51.3598    | 68.4068     | 0.6508      | 0.0454     | 0.2477                  | 95.2288   |
| BrainTransformer [35] | 65.4545    | 84.1394     | 0.8115      | 0.0140     | 0.0501                  | 82.1174   |
| iTransformer [34]     | 51.8758    | 68.9667     | 0.6575      | 0.0625     | 0.1950                  | 121.1810  |
| PatchTST [36]         | 37.6136    | 51.0902     | 0.4802      | 0.5144     | 0.7881                  | 36.8174   |
| SimMTM [40]           | 35.3273    | 48.2508     | 0.4562      | 0.5394     | 0.8346                  | 31.3364   |
| DLinear [38]          | 34.6864    | 46.6826     | 0.4521      | 0.5538     | 0.9280                  | 21.1483   |
| LightTS [39]          | 34.6591    | 46.6462     | 0.4504      | 0.5547     | 0.9254                  | 22.0792   |
| TSMixer [37]          | 42.4833    | 57.5424     | 0.5532      | 0.3926     | 0.6270                  | 48.8311   |
| One Fit All [41]      | 33.4636    | 45.9985     | 0.4342      | 0.5729     | 0.9192                  | 21.1432   |

**Table 7:** Results predicted directly on **ABIDE** using the model trained on UKB.

| <b>Method</b>         | <i>MAE</i> | <i>RMSE</i> | <i>MAPE</i> | <i>PCC</i> | <i>FC<sub>PCC</sub></i> | <i>FN</i> |
|-----------------------|------------|-------------|-------------|------------|-------------------------|-----------|
| BOLD-Cast             | 7.3172     | 10.1247     | 6.1070      | 0.8748     | 0.9846                  | 9.5438    |
| ForecastGrapher [32]  | NaN        | NaN         | NaN         | NaN        | NaN                     | NaN       |
| FourierGNN [33]       | NaN        | NaN         | NaN         | NaN        | NaN                     | NaN       |
| MSGNet [31]           | NaN        | NaN         | NaN         | NaN        | NaN                     | NaN       |
| BrainTransformer [35] | 23.8716    | 33.7675     | 3.8878      | 0.0048     | -0.0020                 | 29.6531   |
| iTransformer [34]     | 21.9021    | 31.2413     | 1.9725      | 0.0375     | 0.1203                  | 24.9755   |
| PatchTST [36]         | 22.8526    | 32.4712     | 4.1760      | 0.0649     | 0.1077                  | 4.0259    |
| SimMTM [40]           | 23.0017    | 32.7778     | 4.2146      | 0.0752     | 0.1102                  | 4.1215    |
| DLinear [38]          | 23.4458    | 33.3469     | 5.1087      | 0.1084     | 0.3826                  | 11.2021   |
| LightTS [39]          | 21.9021    | 31.2413     | 1.9725      | 0.0375     | 0.1203                  | 24.9755   |
| TSMixer [37]          | 10.8325    | 15.4289     | 1.9768      | 0.0533     | 0.1027                  | 4.5713    |
| One Fit All [41]      | 22.8819    | 32.6108     | 4.1938      | 0.0737     | 0.1096                  | 4.0998    |

## 5 Explainability

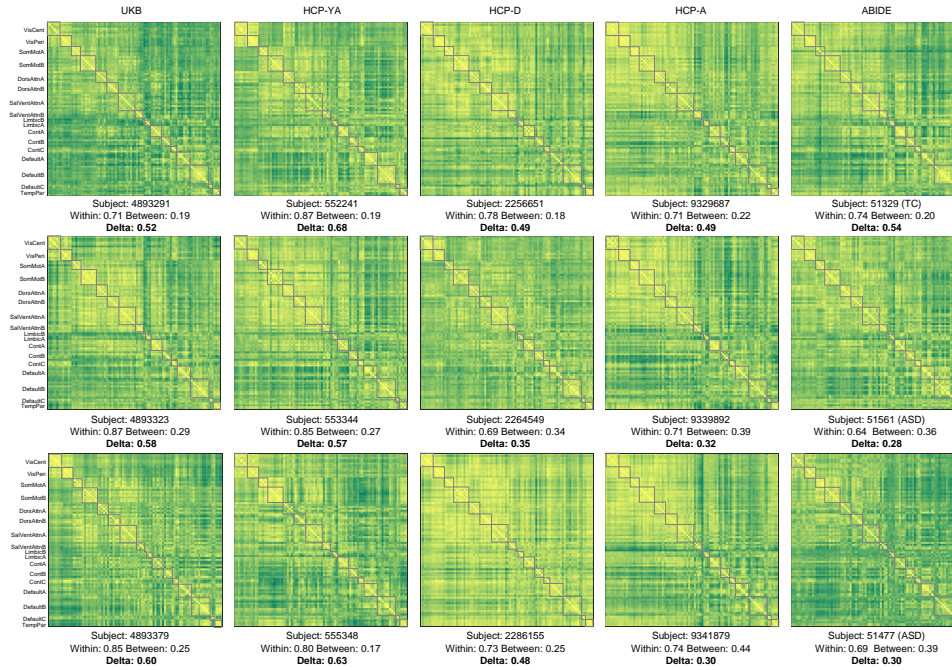

**Fig. 5:** Individual FC matrices generated from BOLD-Cast predictions using the CC200 partitioning method and visualized with Yeo-17 network boundaries. Intra- and inter-network similarity scores are reported (e.g., intra-network: 0.51, inter-network: 0.19 in ABIDE;  $\Delta = 0.32$ ). Typical resting-state modularity was preserved across all datasets, confirming that the shared latent representations learned by BOLD-Cast generalize across groups while maintaining neurobiologically meaningful structure.

## 6 Ablation Study

|                             | Our | A <sub>1</sub> | A <sub>2</sub> | A <sub>3</sub> | A <sub>4</sub> | A <sub>5</sub> | A <sub>6</sub> |
|-----------------------------|-----|----------------|----------------|----------------|----------------|----------------|----------------|
| <i>Loss<sub>match</sub></i> | -   | ×              | -              | -              | -              | ×              | -              |
| <i>Loss<sub>pear</sub></i>  | -   | -              | ×              | -              | -              | ×              | -              |
| <i>Loss<sub>recon</sub></i> | -   | -              | -              | ×              | -              | ×              | -              |
| <i>Loss<sub>con</sub></i>   | -   | -              | -              | -              | ×              | ×              | -              |
| TE                          | -   | -              | -              | -              | -              | -              | ×              |

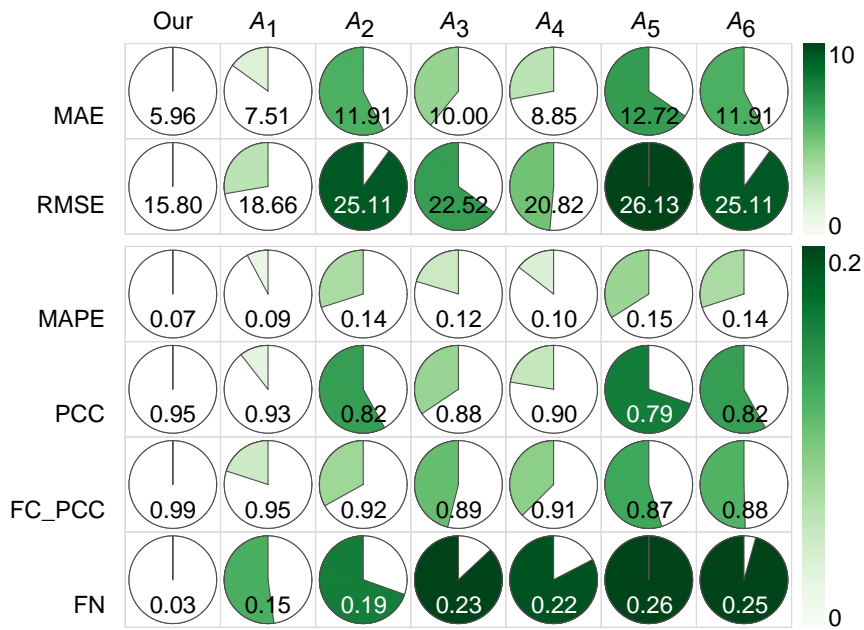

**Fig. 6:** Ablation experiment settings and results. The table above shows the ablation experiment settings. Modules marked with a cross are ablated, and modules marked with a check mark are retained. The figure below shows the degradation of model performance under different ablation settings. Greater degradation indicates larger sector areas.

## 7 fMRI Data Preprocessing Pipeline

**Table 8:** Summary of fMRI preprocessing pipelines for the datasets used in this study. All datasets were preprocessed following their official pipelines to ensure consistency and comparability.

| <b>Preprocessing Step</b>   | <b>UKB</b>       | <b>HCP-YA</b>      | <b>HCP-A</b>       | <b>HCP-D</b>       | <b>ABIDE</b>                          |
|-----------------------------|------------------|--------------------|--------------------|--------------------|---------------------------------------|
| Processing Pipeline         | FSL              | HCP pipeline       | HCP pipeline       | HCP pipeline       | AFNI                                  |
| Slice Time Correction       | O                | O                  | O                  | O                  | O                                     |
| Head Motion Correction      | O                | O                  | O                  | O                  | O                                     |
| Motion Co-registration      | FSL<br>applywarp | O                  | O                  | O                  | O                                     |
| Spatial Smoothing           | X                | X                  | X                  | X                  | 6 mm                                  |
| High-pass Filtering         | O                | Gaussian<br>(200s) | Gaussian<br>(200s) | Gaussian<br>(200s) | 0.009                                 |
| Low-pass Filtering          | X                | X                  | X                  | X                  | 0.08                                  |
| Denoising                   | ICA-FIX          | ICA-FIX            | ICA-FIX            | ICA-FIX            | 3dDeconvolve<br>(nuisance regression) |
| Discarding First Timepoints | X                | X                  | X                  | X                  | X                                     |

## 8 Model training

**Table 9:** Summary of key hyperparameters and settings for **BOLD-Cast**.

| Parameter                        | Default Value        | Description                       |
|----------------------------------|----------------------|-----------------------------------|
| <i>Data Loader Configuration</i> |                      |                                   |
| task_name                        | 'long_term_forecast' | Task name                         |
| drop_last                        | True                 | Drop last incomplete batch        |
| val_set_shuffle                  | False                | Shuffle validation set            |
| drop_short                       | True                 | Drop short sequences              |
| his_len                          | 81                   | Historical sequence length        |
| pre_len                          | 81                   | Prediction length                 |
| <i>Model Configuration</i>       |                      |                                   |
| epoch                            | 100                  | Training epoch                    |
| lr                               | 0.001                | Learning rate                     |
| bs                               | 32                   | Batch size                        |
| patience                         | 5                    | Early stop patience               |
| loss                             | MSE                  | Loss function                     |
| is_training                      | 1                    | Training status (1=train, 0=test) |
| llm_ckp_dir                      | gpt2                 | Pre-trained LLM checkpoint        |
| dropout                          | 0.1                  | Dropout rate                      |
| enc_in                           | 7                    | Encoder input size                |
| dec_in                           | 7                    | Decoder input size                |

**Table 10:** Summary of key hyperparameters and settings for **Brain-Transformer/iTransformer/Dlinear/TSMixer**.

| Parameter                        | Default Value        | Description                       |
|----------------------------------|----------------------|-----------------------------------|
| <i>Data Loader Configuration</i> |                      |                                   |
| task_name                        | 'long_term_forecast' | Task name                         |
| drop_last                        | True                 | Drop last incomplete batch        |
| val_set_shuffle                  | False                | Shuffle validation set            |
| drop_short                       | True                 | Drop short sequences              |
| seq_len                          | 162                  | Input sequence length             |
| his_len                          | 81                   | Start token length                |
| pre_len                          | 81                   | Prediction sequence length        |
| moving_avg                       | 25                   | Window size of moving average     |
| d_ff                             | 2048                 | Dimension of fcn                  |
| features                         | 'M'                  | Forecasting task                  |
| freq                             | 's'                  | Freq for time features encoding   |
| d_model                          | 512                  | Dimension of model                |
| c_out                            | 7                    | Output size                       |
| <i>Model Configuration</i>       |                      |                                   |
| epoch                            | 100                  | Training epoch                    |
| lr                               | 0.001                | Learning rate                     |
| bs                               | 32                   | Batch size                        |
| patience                         | 5                    | Early stop patience               |
| loss                             | MSE                  | Loss function                     |
| is_training                      | 1                    | Training status (1=train, 0=test) |
| llm_ckp_dir                      | gpt2                 | Pre-trained LLM checkpoint        |
| dropout                          | 0.1                  | Dropout rate                      |
| enc_in                           | 7                    | Encoder input size                |
| dec_in                           | 7                    | Decoder input size                |

**Table 11:** Summary of key hyperparameters and settings for LightTS/PatchTST.

| Parameter                        | Default Value        | Description                       |
|----------------------------------|----------------------|-----------------------------------|
| <i>Data Loader Configuration</i> |                      |                                   |
| task_name                        | 'long_term_forecast' | Task name                         |
| drop_last                        | True                 | Drop last incomplete batch        |
| val_set_shuffle                  | False                | Shuffle validation set            |
| drop_short                       | True                 | Drop short sequences              |
| seq_len                          | 162                  | Input sequence length             |
| his_len                          | 81                   | Start token length                |
| pre_len                          | 81                   | Prediction sequence length        |
| moving_avg                       | 25                   | Window size of moving average     |
| d_ff                             | 2048                 | Dimension of fc                   |
| features                         | 'M'                  | Forecasting task                  |
| freq                             | 's'                  | Freq for time features encoding   |
| d_model                          | 64                   | Dimension of model                |
| c_out                            | 7                    | Output size                       |
| <i>Model Configuration</i>       |                      |                                   |
| epoch                            | 100                  | Training epoch                    |
| lr                               | 0.001                | Learning rate                     |
| bs                               | 32                   | Batch size                        |
| patience                         | 5                    | Early stop patience               |
| loss                             | MSE                  | Loss function                     |
| is_training                      | 1                    | Training status (1=train, 0=test) |
| llm_ckp_dir                      | gpt2                 | Pre-trained LLM checkpoint        |
| dropout                          | 0.1                  | Dropout rate                      |
| enc_in                           | 190                  | Encoder input size                |
| dec_in                           | 190                  | Decoder input size                |
| stride                           | 8                    | Stride                            |
| patch_len                        | 16                   | Patch length                      |
| head_dropout                     | 0.0                  | Head dropout                      |

**Table 12:** Summary of key hyperparameters and settings for **One Fit All**.

| Parameter                        | Default Value        | Description                       |
|----------------------------------|----------------------|-----------------------------------|
| <i>Data Loader Configuration</i> |                      |                                   |
| task_name                        | 'long_term_forecast' | Task name                         |
| drop_last                        | True                 | Drop last incomplete batch        |
| val_set_shuffle                  | False                | Shuffle validation set            |
| drop_short                       | True                 | Drop short sequences              |
| seq_len                          | 162                  | Input sequence length             |
| his_len                          | 81                   | Start token length                |
| pre_len                          | 81                   | Prediction sequence length        |
| moving_avg                       | 25                   | Window size of moving average     |
| d_ff                             | 2048                 | Dimension of fc                   |
| features                         | 'M'                  | Forecasting task                  |
| freq                             | 's'                  | freq for time features encoding   |
| d_model                          | 768                  | Dimension of model                |
| is_gpt                           | 1                    | Use GPT                           |
| pretrain                         | 1                    | Use pretrained model              |
| patch_size                       | 16                   | Use GPT                           |
| gpt_layer                        | 3                    | layer number of GPT               |
| <i>Model Configuration</i>       |                      |                                   |
| epoch                            | 20                   | Training epoch                    |
| lr                               | 0.0001               | Learning rate                     |
| bs                               | 8                    | Batch size                        |
| patience                         | 5                    | Early stop patience               |
| loss                             | MSE                  | Loss function                     |
| is_training                      | 1                    | Training status (1=train, 0=test) |
| llm_ckp_dir                      | gpt2                 | Pre-trained LLM checkpoint        |
| dropout                          | 0.1                  | Dropout rate                      |
| enc_in                           | 7                    | Encoder input size                |
| dec_in                           | 7                    | Decoder input size                |

**Table 13:** Summary of key hyperparameters and settings for **SimMTM**.

| Parameter                        | Default Value | Description                                                       |
|----------------------------------|---------------|-------------------------------------------------------------------|
| <i>Data Loader Configuration</i> |               |                                                                   |
| drop_last                        | True          | Drop last incomplete batch                                        |
| val_set_shuffle                  | False         | Shuffle validation set                                            |
| drop_short                       | True          | Drop short sequences                                              |
| seq_len                          | 162           | Input sequence length                                             |
| his_len                          | 81            | Start token length                                                |
| pre_len                          | 81            | Prediction sequence length                                        |
| moving_avg                       | 25            | Window size of moving average                                     |
| d_ff                             | 2048          | Dimension of fcn                                                  |
| features                         | 'M'           | Forecasting task                                                  |
| freq                             | 's'           | Freq for time features encoding                                   |
| d_model                          | 512           | Dimension of model                                                |
| c_out                            | 7             | Output size                                                       |
| <i>Model Configuration</i>       |               |                                                                   |
| task_name                        | 'finetune'    | Task name                                                         |
| epoch                            | 100           | Training epoch                                                    |
| lr                               | 0.001         | Learning rate                                                     |
| bs                               | 32            | Batch size                                                        |
| patience                         | 5             | Early stop patience                                               |
| loss                             | MSE           | Loss function                                                     |
| is_training                      | 1             | Training status (1=train, 0=test)                                 |
| llm_ckp_dir                      | gpt2          | Pre-trained LLM checkpoint                                        |
| dropout                          | 0.1           | Dropout rate                                                      |
| enc_in                           | 7             | Encoder input size                                                |
| dec_in                           | 7             | Decoder input size                                                |
| temperature                      | 0.2           | temperature                                                       |
| lm                               | 3             | Average masking length                                            |
| positive_nums                    | 3             | Masking series numbers                                            |
| rbtp                             | 1             | (0: rebuild the embedding of oral series; 1: rebuild oral series) |
| masked_rule                      | 'geometric'   | (geometric, random, masked tail, masked head)                     |
| mask_rate                        | 7             | Mask ratio                                                        |
| stride                           | 12            | Stride                                                            |
| patch_len                        | 12            | Patch length                                                      |
| head_dropout                     | 0.1           | Head dropout                                                      |

**Table 14:** Summary of key hyperparameters and settings for **ForecastGrapher**.

| Parameter                        | Default Value        | Description                       |
|----------------------------------|----------------------|-----------------------------------|
| <i>Data Loader Configuration</i> |                      |                                   |
| task_name                        | 'long_term_forecast' | Task name                         |
| drop_last                        | True                 | Drop last incomplete batch        |
| val_set_shuffle                  | False                | Shuffle validation set            |
| drop_short                       | True                 | Drop short sequences              |
| seq_len                          | 162                  | Input sequence length             |
| his_len                          | 81                   | Start token length                |
| pre_len                          | 81                   | Prediction sequence length        |
| moving_avg                       | 25                   | Window size of moving average     |
| d_ff                             | 2048                 | Dimension of fc                   |
| features                         | 'M'                  | Forecasting task                  |
| freq                             | 's'                  | Freq for time features encoding   |
| d_model                          | 512                  | Dimension of model                |
| c_out                            | 190                  | Output size                       |
| num_nodes                        | 190                  | To create graph                   |
| subgrpah_size                    | 3                    | Neighbors number                  |
| k                                | 3                    | Number of GNN block               |
| num_dim                          | 10                   | Node embbed to dim dimentions     |
| <i>Model Configuration</i>       |                      |                                   |
| epoch                            | 100                  | Training epoch                    |
| lr                               | 0.001                | Learning rate                     |
| bs                               | 32                   | Batch size                        |
| patience                         | 5                    | Early stop patience               |
| loss                             | MSE                  | Loss function                     |
| is_training                      | 1                    | Training status (1=train, 0=test) |
| llm_ckp_dir                      | gpt2                 | Pre-trained LLM checkpoint        |
| dropout                          | 0.1                  | Dropout rate                      |
| enc_in                           | 7                    | encoder input size                |
| dec_in                           | 7                    | decoder input size                |

**Table 15:** Summary of BrainGB and PTGB implementation details in our downstream tasks.

| <b>Aspect</b>             | <b>BrainGB (Classification)</b>            | <b>PTGB (Regression)</b>             |
|---------------------------|--------------------------------------------|--------------------------------------|
| <b>Task Type</b>          | ASD diagnosis, Sex prediction              | fMRI-based phenotype regression      |
| <b>Output Layer</b>       | Softmax classifier (original)              | Linear projection layer (no softmax) |
| <b>Loss Function</b>      | Cross-entropy loss                         | Mean squared error                   |
| <b>Evaluation Metrics</b> | Accuracy, Precision, F1-score, Specificity | MAE, RMSE, MPAE, PCC                 |
| <b>Graph Input</b>        | Static FC matrix per subject               | Static FC matrix per subject         |
| <b>Graph Backbone</b>     | GIN / GAT (unchanged)                      | GIN / GAT (unchanged)                |
| <b>Pooling Method</b>     | Global mean or attention pooling           | Global mean or attention pooling     |
| <b>Optimizer</b>          | Adam                                       | Adam                                 |
| <b>Learning Rate</b>      | 0.001                                      | 0.001                                |
| <b>Epochs</b>             | 100 (early stop)                           | 100 (early stop)                     |
| <b>Batch Size</b>         | 32                                         | 32                                   |
| <b>Model Structure</b>    | 3 GNN layers + 2-layer MLP                 | 3 GNN layers + 2-layer MLP           |
